# Supplementary material
Source: publisher figshare collection journal article supplement (https://acs.figshare.com/ndownloader/files/25122036)
Supplement: Supplementary file 1 [file 25122036]

*Supporting Information for*

# The Predominant Effect of Material Surface Hydrophobicity on Gypsum Scale Formation

*Xiaochuan Huang<sup>a,b</sup>, Chen Li<sup>a,c</sup>, Kuichang Zuo<sup>a,b</sup>, Qilin Li<sup>a,b,\*</sup>*

<sup>a</sup>Department of Civil and Environmental Engineering, Rice University, MS-519, 6100 Main  
Street, Houston 77005, United States

<sup>b</sup>NSF Nanosystems Engineering Research Center for Nanotechnology-Enabled Water Treatment,  
Rice University, MS-6398, 6100 Main Street, Houston 77005, United States

<sup>c</sup>School of Environment, Tsinghua University, Beijing 100084, China

\*Corresponding author:

Qilin Li, Email: [qilin.li@rice.edu](mailto:qilin.li@rice.edu), Phone: 713-348-2046

Kuichang Zuo, Email: [kuichang.zuo@rice.edu](mailto:kuichang.zuo@rice.edu), Phone: 832-230-7547

**6 Pages, 5 Text Sections, 3 Tables, 5 Figures**

## Supplemental materials

### Text S1. The fabrication of gold-coated silicon chips

Before Au coating, silicon chips were sonicated sequentially in acetone, methanol and isopropanol solutions each for 15 min and dried with ultra-pure N<sub>2</sub>.<sup>1</sup> Clean Si chips were then coated with a 5-nm Ti layer followed by a 10-nm Au layer using a sputter coater (Denton Desk V Sputter system, Denton Vacuum).

### Text S2. The cleaning procedure of QCM sensors and substrates

All substrates were cleaned thoroughly immediately before SAM preparation. The gold QCM sensors and gold-coated silicon chips were cleaned sequentially in toluene, acetone and ethanol in a sonication bath, twice in each solution for 10 min each time.<sup>1</sup> After thorough rinsing with MilliQ water and dried with ultra-pure N<sub>2</sub> gas, they were further cleaned with a UV/Ozone cleaner (UV/Ozone ProCleaner, Bioforce Nanosciences) for 30 min. SiO<sub>2</sub> QCM sensors and glass slides were first cleaned in the UV/Ozone chamber for 10 min, and then immersed in 2% SDS solution for 30 min at room temperature. After thorough rinsing with MilliQ water and dried with ultra-pure N<sub>2</sub> gas, they were treated with the UV/Ozone cleaner for another 10 min. The water contact angles were used as a quick check for the formation of SAMs. For clean gold chips and glass slides, the surfaces were extremely hydrophilic with contact angles of less than 20°. (Figure S1)

### Text S3. Calculation the surface tension components of each substrates.

The surface tension components of the substrates were calculated by the following equation<sup>2</sup>,

$$(1 + \cos \theta) \gamma_l = 2(\sqrt{\gamma_s^{LW} \gamma_l^{LW}} + \sqrt{\gamma_s^+ \gamma_l^-} + \sqrt{\gamma_s^- \gamma_l^+}) \quad (S1)$$

Where, *l* and *s* stand for liquid and substrate; *cosθ* was calculated from measured contact angle between the respective liquid and the substrate (Figure S2). The calculated surface tension components were reported in Table S3.

**Text S4.** The hydration energy  $\Delta G_{ls}$  between liquid  $l$  and substrate  $s$  is calculated by the following equation,

$$\Delta G_{ls} = -\gamma_l(1 + \cos \theta) \quad (\text{S2})$$

**Text S5.** The deduction of equation (3) in the manuscript when the  $\gamma_n^+$  and  $\gamma_s^+$  are negligible.

$$\gamma_{ns} = (\sqrt{\gamma_n^{LW}} - \sqrt{\gamma_s^{LW}})^2 + 2(\sqrt{\gamma_n^+ \gamma_n^-} + \sqrt{\gamma_s^+ \gamma_s^-} - \sqrt{\gamma_n^+ \gamma_s^-} - \sqrt{\gamma_n^- \gamma_s^+}) \approx (\sqrt{\gamma_n^{LW}} - \sqrt{\gamma_s^{LW}})^2 \quad (\text{S3})$$

$$\gamma_{ls} = (\sqrt{\gamma_l^{LW}} - \sqrt{\gamma_s^{LW}})^2 + 2(\sqrt{\gamma_l^+ \gamma_l^-} + \sqrt{\gamma_s^+ \gamma_s^-} - \sqrt{\gamma_l^+ \gamma_s^-} - \sqrt{\gamma_l^- \gamma_s^+}) \approx (\sqrt{\gamma_l^{LW}} - \sqrt{\gamma_s^{LW}})^2 + 2(\sqrt{\gamma_l^+ \gamma_l^-} - \sqrt{\gamma_l^+ \gamma_s^-}) \quad (\text{S4})$$

$$\begin{aligned} \gamma_{ns} - \gamma_{ls} &\approx (\sqrt{\gamma_n^{LW}} - \sqrt{\gamma_s^{LW}})^2 - (\sqrt{\gamma_l^{LW}} - \sqrt{\gamma_s^{LW}})^2 - 2(\sqrt{\gamma_l^+ \gamma_l^-} - \sqrt{\gamma_l^+ \gamma_s^-}) \\ &= \gamma_n^{LW} - \gamma_l^{LW} - 2\sqrt{\gamma_s^{LW}}(\sqrt{\gamma_n^{LW}} - \sqrt{\gamma_l^{LW}}) + 2\sqrt{\gamma_s^-} \sqrt{\gamma_l^+} - 2\sqrt{\gamma_l^+ \gamma_l^-} \end{aligned} \quad (\text{S5})$$

**Table S1.** the detailed characteristics of -OH, -CH<sub>3</sub> and -CF<sub>3</sub> terminated SAMs

| Terminal group   | functionalized thiol/silane                                                                                                                           | Contact angle (°) | Roughness (nm) | Elemental ratio by XPS |                 |                 |
|------------------|-------------------------------------------------------------------------------------------------------------------------------------------------------|-------------------|----------------|------------------------|-----------------|-----------------|
|                  |                                                                                                                                                       |                   |                | O:C ratio              | F:C ratio       | S:C ratio       |
| -OH              | HS-(CH <sub>2</sub> ) <sub>11</sub> OH                                                                                                                | 45.3±5.1          | 0.6±0.06       | 0.08<br>(0.09)*        | -               | 0.07<br>(0.08)* |
| -CH <sub>3</sub> | HS-(CH <sub>2</sub> ) <sub>11</sub> CH <sub>3</sub>                                                                                                   | 105.1±0.9         | 0.7±0.06       | -                      | -               | 0.05<br>(0.08)* |
| -CF <sub>3</sub> | (CH <sub>3</sub> CH <sub>2</sub> ) <sub>3</sub> O <sub>3</sub> Si-<br>(CH <sub>2</sub> ) <sub>2</sub> (CF <sub>2</sub> ) <sub>7</sub> CF <sub>3</sub> | 119.2±1.2         | 0.9±0.07       | -                      | 1.22<br>(1.06)* | -               |

\* Theoretical elemental ratio based on molecular formula.

**Table S2.** the surface tension components of the three probe liquids<sup>2</sup>

|       | $\gamma_l$ | $\gamma^{LW}$ | $\gamma^{AB}$ | $\gamma^+$ | $\gamma^-$ |
|-------|------------|---------------|---------------|------------|------------|
| Water | 72.8       | 21.8          | 51            | 25.5       | 25.5       |

|                 |      |      |    |      |    |
|-----------------|------|------|----|------|----|
| Diiodomethane   | 50.8 | 50.8 | 0  | 0    | 0  |
| Ethylene glycol | 48   | 29   | 19 | 1.92 | 47 |

**Table S3.** the surface tension components of gypsum and SAMs calculated from contact angles measurements

|                     | $\gamma^T$ | $\gamma^{LW}$ | $\gamma^{AB}$ | $\gamma^+$ | $\gamma^-$ |
|---------------------|------------|---------------|---------------|------------|------------|
| -CF <sub>3</sub>    | 9.82       | 9.52          | 0.29          | 0.061      | 0.35       |
| -CH <sub>3</sub>    | 25.22      | 25.08         | 0.14          | 0.33       | 0.015      |
| -OH                 | 45.46      | 41.42         | 4.04          | 0.11       | 35.89      |
| CaSO <sub>4</sub> * | 47.76*     | 47.14*        | 0.62*         | 0.002*     | 47.87*     |

\* Values were of gypsum freshly cleaved from selenite plane, adopted from Teng *et al*<sup>3</sup>

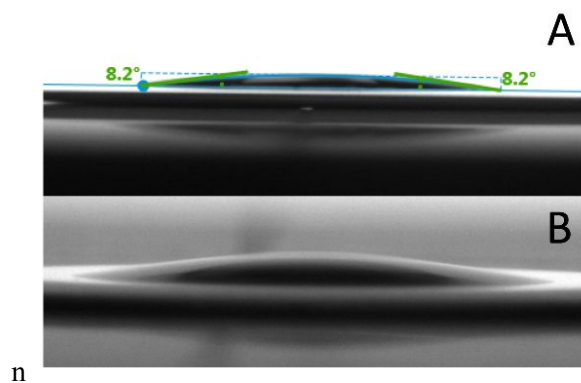

**Figure S1.** Water contact angles of sensors. The contact angle of clean gold sensor (A) and SiO<sub>2</sub> sensor (B).

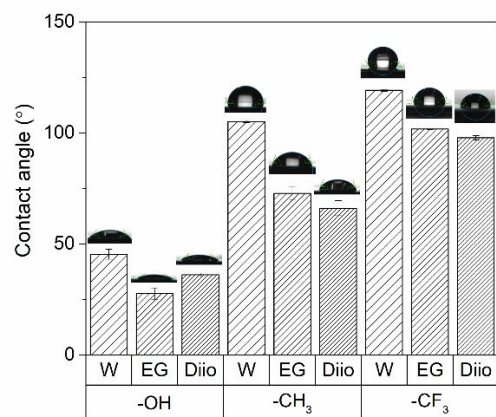

**Figure S2.** Contact angles of water(W), ethylene glycol (EG) and diiodomethane (Dio) on different SAMs.

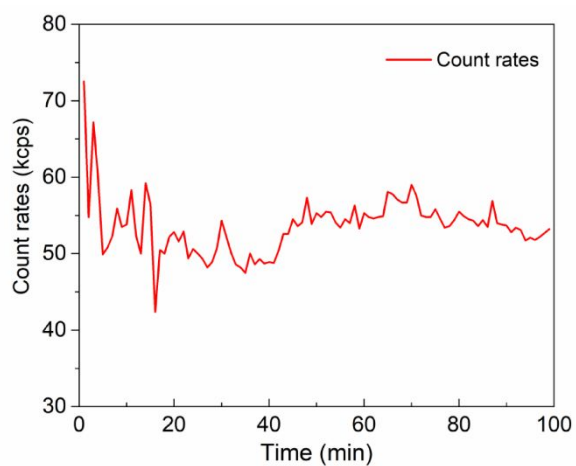

**Figure S3.** the light scattering intensity of 25 mM  $\text{CaSO}_4$  solution over time.

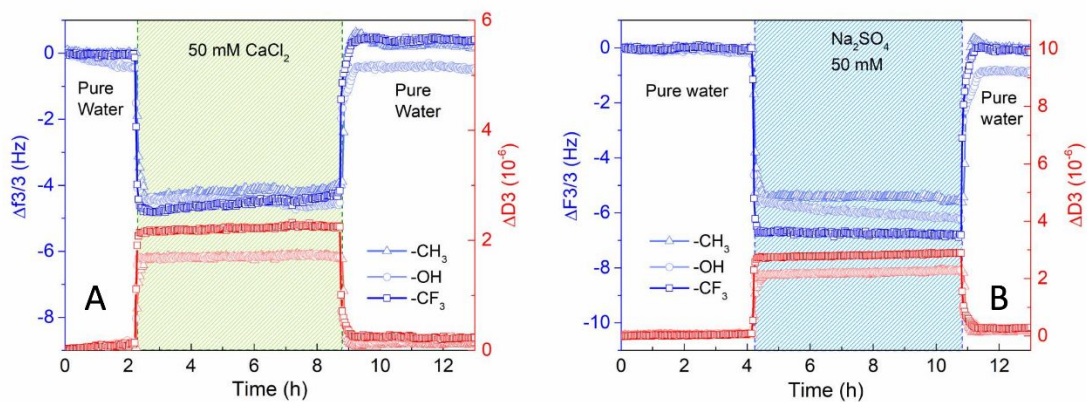

**Figure S4.** the reversible adsorption on different SAMs of  $\text{CaCl}_2$  (A) and  $\text{Na}_2\text{SO}_4$  (B) in short experiment period.

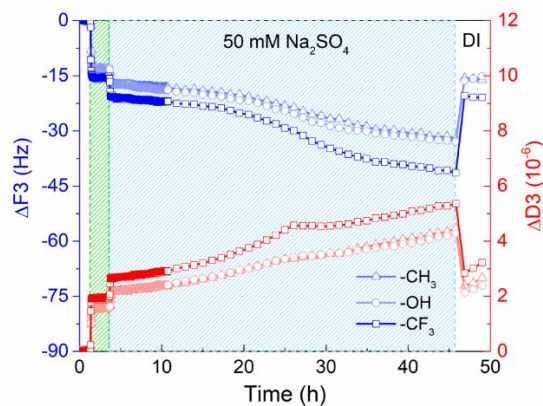

**Figure S5.** Repeat experiment results of ion-induced gypsum nucleation.

## REFERENCES

1. Steiner, Z.; Rapaport, H.; Oren, Y.; Kasher, R., Effect of surface-exposed chemical groups on calcium-phosphate mineralization in water-treatment systems. *Environ Sci Technol* **2010**, *44*, 7937-7943.
2. Oss, C. J. v., *Interfacial forces in aqueous media*. 2nd ed.; Taylor & Francis Group: United States of America 2006.
3. Teng, F.; Zeng, H.; Liu, Q., Understanding the deposition and surface interactions of gypsum. *The Journal of Physical Chemistry C* **2011**, *115* (35), 17485-17494.
